# Supplementary material for: From comorbidities of chronic obstructive pulmonary disease to identification of shared molecular mechanisms by data integration
Source: PubMed Central journal article supplement (PMC5133493; doi:10.1186/s12859-016-1291-3), 2016-11-22
Supplement: 12859_2016_1291_MOESM7_ESM.pdf [file 12859_2016_1291_MOESM7_ESM.pdf]

**(a) Genes**

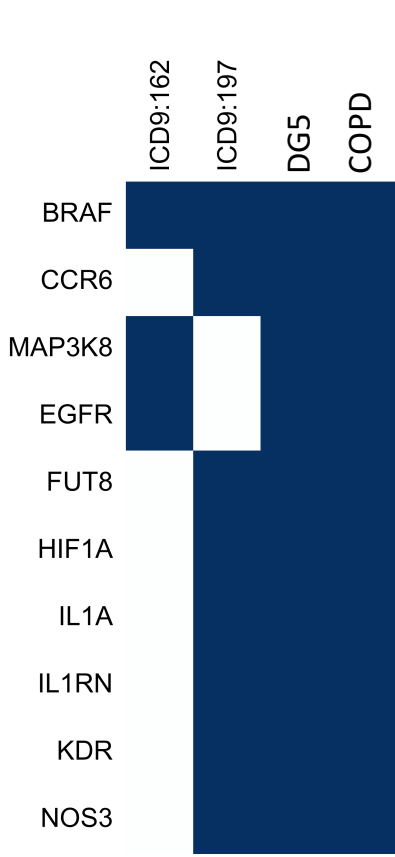

**(b) KEGG**

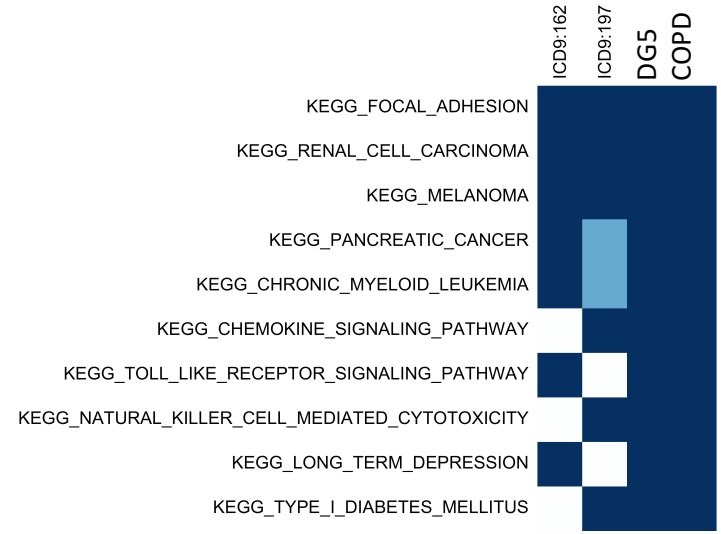

**(c) Gene Ontology**

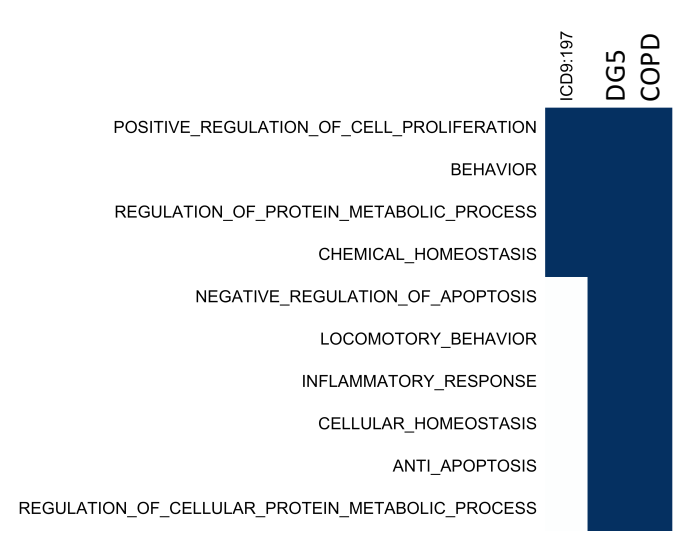

**(d) ICD9 codes description**

ICD9:162 Malignant neoplasm of trachea, bronchus, and lung  
 ICD9:197 Secondary malignant neoplasm of respiratory and digestive systems

**Fig. S3**
