# Supplementary material for: From comorbidities of chronic obstructive pulmonary disease to identification of shared molecular mechanisms by data integration
Source: PubMed Central journal article supplement (PMC5133493; doi:10.1186/s12859-016-1291-3), 2016-11-22
Supplement: 12859_2016_1291_MOESM9_ESM.pdf [file 12859_2016_1291_MOESM9_ESM.pdf]

(a) Reactome

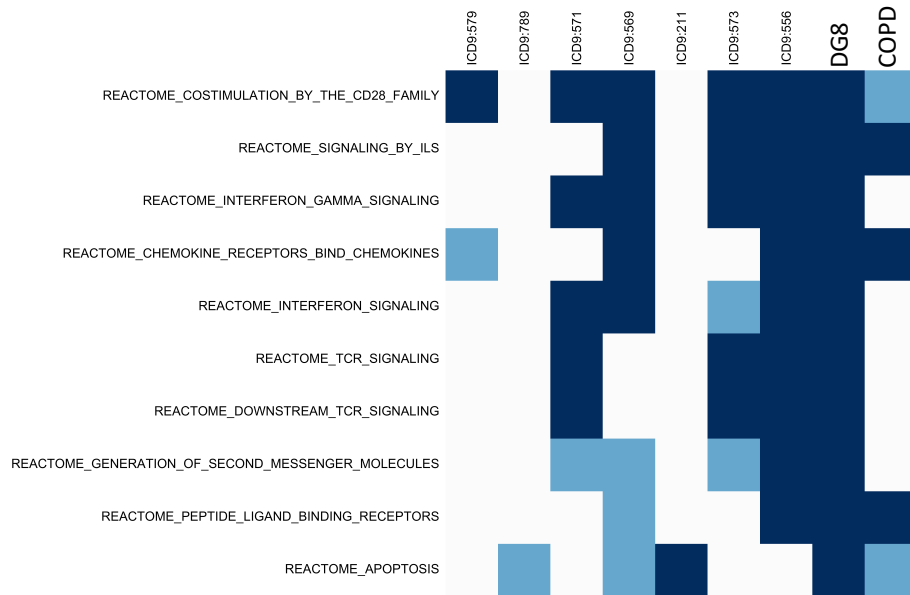

(b) Biocarta

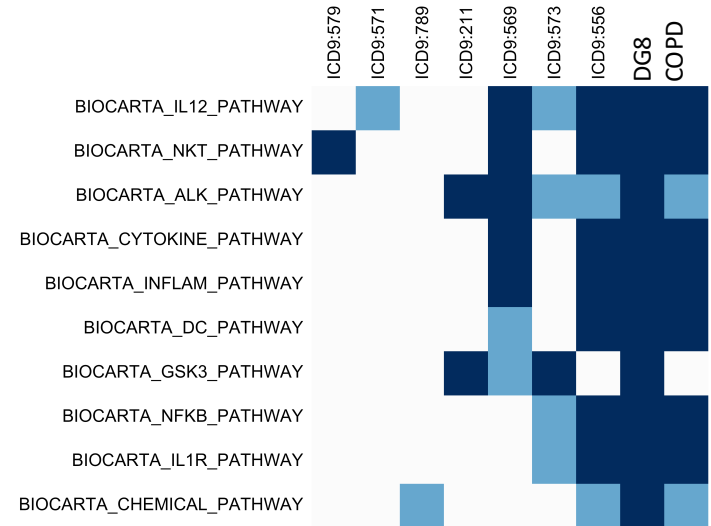

(c) ICD9 codes description

- ICD9:211 Benign neoplasm of other parts of digestive system
- ICD9:251 Other disorders of pancreatic internal secretion
- ICD9:556 Ulcerative colitis
- ICD9:569 Other disorders of intestine
- ICD9:571 Chronic liver disease and cirrhosis
- ICD9:573 Other disorders of liver
- ICD9:577 Diseases of pancreas
- ICD9:579 Intestinal malabsorption
- ICD9:789 Other symptoms involving abdomen and pelvis

Fig. S5
