# Supplementary material for: From comorbidities of chronic obstructive pulmonary disease to identification of shared molecular mechanisms by data integration
Source: PubMed Central journal article supplement (PMC5133493; doi:10.1186/s12859-016-1291-3), 2016-11-22
Supplement: 12859_2016_1291_MOESM11_ESM.pdf [file 12859_2016_1291_MOESM11_ESM.pdf]

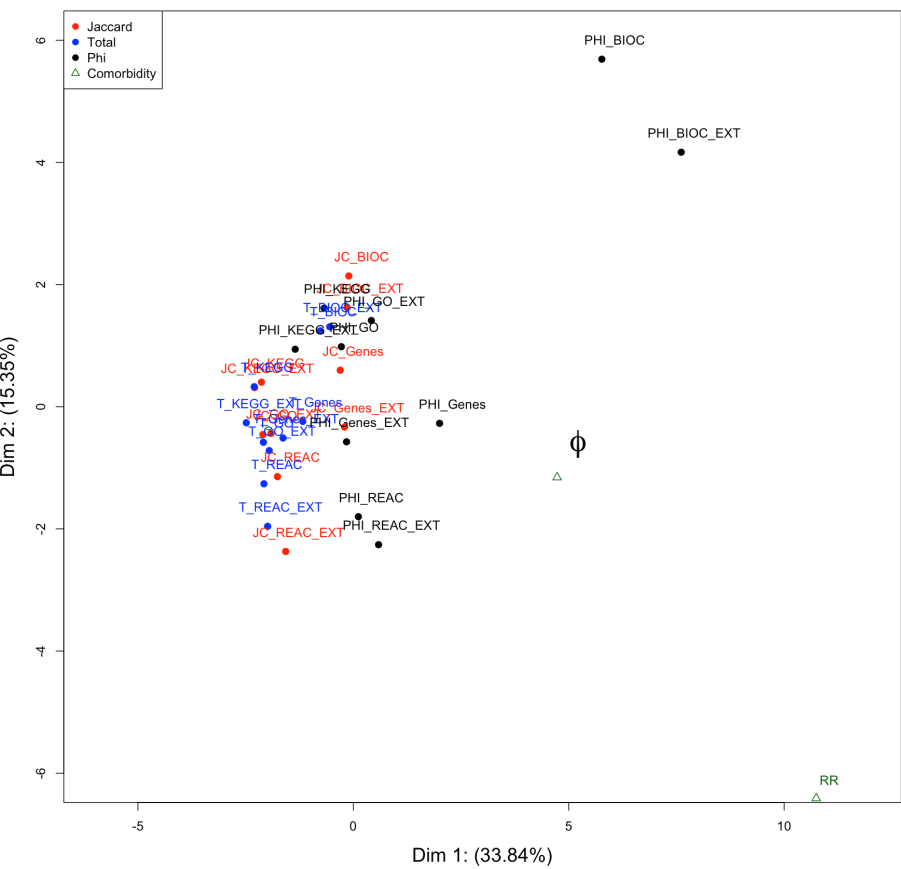

(a)

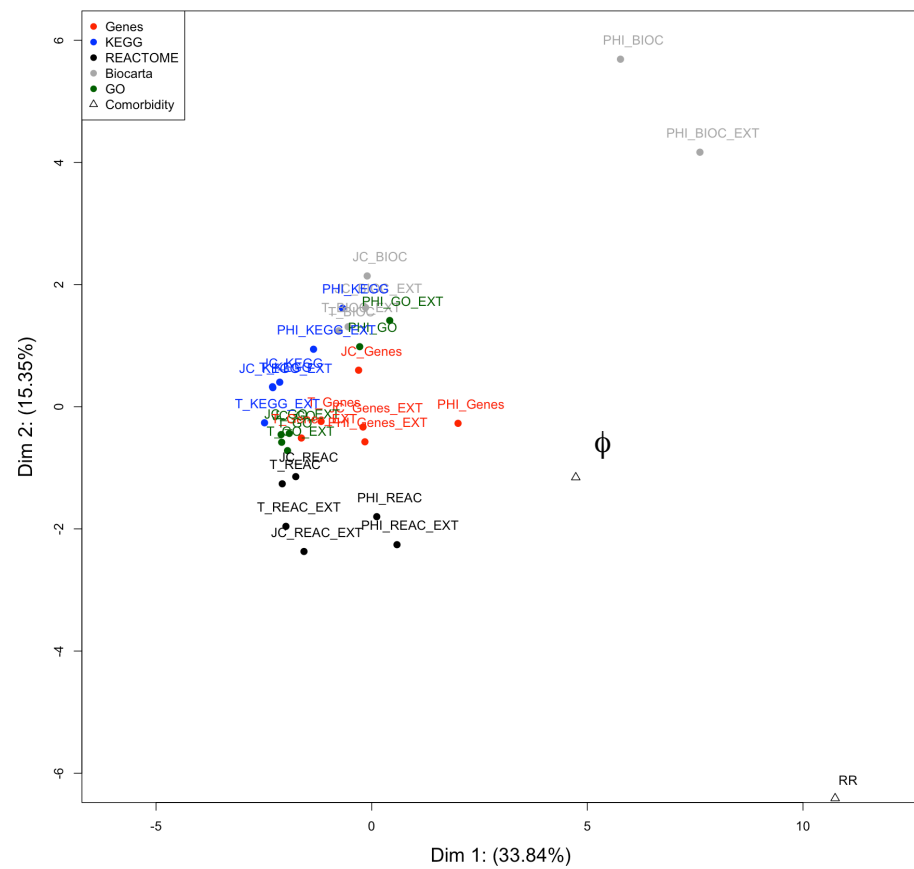

(b)

Fig. S7
